# Supplementary material
Source: MDPI journal article supplement (https://www.mdpi.com/1424-2818/13/9/431)
Supplement: s1 [file s1]

**Table S1.** Characteristics of the fruits and seeds (mean  $\pm$  SD) obtained by spontaneous, self- and cross-pollination (Self and Cross, respectively) in flowers of native and non-native populations of *Oenothera drummondii*. The last row of each trait of fruits and seeds show the comparison (Wilcoxon test) between self- and cross-pollination data of each population (ns = not significant; \*  $p = 0.05$ ; \*\*  $p = 0.01$ ; \*\*\*  $p = <0.001$ ). Population acronyms provided in Figure 1.

| Characteristics of<br>Fruits and seeds | Pollination<br>treatment | Native populations |                  |                  |                  |                  |                  | Non-native populations |                  |                  |                  |
|----------------------------------------|--------------------------|--------------------|------------------|------------------|------------------|------------------|------------------|------------------------|------------------|------------------|------------------|
|                                        |                          | OJO                | SON              | MAN              | TEC              | SPA              | BOL              | LEZ                    | MAH              | MUI              | DIQ              |
| Fruit set (%)                          | Spontaneous              | 0                  | 12               | 20               | 15               | 2                | 19               | 5                      | 4                | 0                | 7                |
|                                        | Self                     | 96                 | 100              | 96               | 96               | 100              | 92               | 96                     | 97               | 100              | 100              |
|                                        | Cross                    | 92                 | 100              | 96               | 100              | 100              | 100              | 100                    | 100              | 100              | 100              |
| Self-Compatibility Index               |                          | 1.04               | 1.00             | 1.00             | 0.96             | 1.00             | 0.92             | 0.96                   | 0.97             | 1.00             | 1.00             |
| Fruit weight (mg)                      | Spontaneous              | 11.4 $\pm$ 2.1     | 18.1 $\pm$ 14.6  | 34.2 $\pm$ 29.4  | 24.3 $\pm$ 24.1  | 22.9 $\pm$ 17.2  | 35.8 $\pm$ 48.6  | 18.0 $\pm$ 12.2        | 22.9 $\pm$ 5.3   | 11.9 $\pm$ 12.9  | 17.8 $\pm$ 24.9  |
|                                        | Self                     | 112.7 $\pm$ 28.5   | 104.6 $\pm$ 37.6 | 105.6 $\pm$ 56.8 | 112.4 $\pm$ 56.9 | 107.8 $\pm$ 68.5 | 117.5 $\pm$ 85.0 | 112.6 $\pm$ 64.0       | 139.0 $\pm$ 81.7 | 97.7 $\pm$ 35.5  | 109.0 $\pm$ 48.7 |
|                                        | Cross                    | 131.3 $\pm$ 51.4   | 102.8 $\pm$ 41.5 | 149.2 $\pm$ 50.7 | 127.9 $\pm$ 70.9 | 113.8 $\pm$ 44.0 | 192.8 $\pm$ 66.5 | 96.3 $\pm$ 61.6        | 176.1 $\pm$ 67.5 | 116.6 $\pm$ 37.3 | 84.4 $\pm$ 56.6  |
|                                        |                          | ns                 | ns               | ***              | ns               | ns               | ***              | ns                     | ns               | *                | ns               |
| Fruit length (mm)                      | Spontaneous              | 18.8 $\pm$ 3.2     | 22.8 $\pm$ 5.3   | 23.7 $\pm$ 7.2   | 21.2 $\pm$ 4.9   | 18.1 $\pm$ 4.3   | 22.3 $\pm$ 5.2   | 16.7 $\pm$ 3.4         | 19.4 $\pm$ 3.0   | 12.63 $\pm$ 1.6  | 14.1 $\pm$ 3.2   |
|                                        | Self                     | 36.9 $\pm$ 6.0     | 35.3 $\pm$ 6.6   | 31.2 $\pm$ 6.9   | 32.7 $\pm$ 6.7   | 32.2 $\pm$ 8.3   | 31.6 $\pm$ 10    | 26.8 $\pm$ 8.8         | 30.4 $\pm$ 9.9   | 29.1 $\pm$ 4.0   | 23.2 $\pm$ 4.6   |
|                                        | Cross                    | 38.9 $\pm$ 8.3     | 37.7 $\pm$ 7.8   | 35.6 $\pm$ 4.4   | 35.7 $\pm$ 8.6   | 28.2 $\pm$ 5.1   | 36.7 $\pm$ 6.2   | 28.1 $\pm$ 7.8         | 33.4 $\pm$ 5.9   | 29.8 $\pm$ 3.3   | 21.1 $\pm$ 5.8   |
|                                        |                          | ns                 | ns               | **               | ns               | ns               | **               | ns                     | ns               | ns               | ns               |
| Fruit width (mm)                       | Spontaneous              | 0.9 $\pm$ 0.1      | 0.9 $\pm$ 0.2    | 1.3 $\pm$ 0.3    | 1.22 $\pm$ 0.3   | 1.3 $\pm$ 0.2    | 1.5 $\pm$ 0.5    | 1.4 $\pm$ 0.2          | 1.4 $\pm$ 0.2    | 1.1 $\pm$ 0.1    | 1.3 $\pm$ 0.3    |
|                                        | Self                     | 1.9 $\pm$ 0.2      | 1.9 $\pm$ 0.4    | 2.0 $\pm$ 0.5    | 2.0 $\pm$ 0.5    | 2.0 $\pm$ 0.6    | 2.2 $\pm$ 0.7    | 2.2 $\pm$ 0.5          | 2.3 $\pm$ 0.6    | 2.2 $\pm$ 0.3    | 2.6 $\pm$ 0.5    |
|                                        | Cross                    | 2.1 $\pm$ 0.4      | 2.0 $\pm$ 0.3    | 2.2 $\pm$ 0.5    | 2.2 $\pm$ 0.5    | 2.3 $\pm$ 0.4    | 2.6 $\pm$ 0.5    | 2.1 $\pm$ 0.6          | 2.9 $\pm$ 0.5    | 2.5 $\pm$ 0.3    | 2.2 $\pm$ 0.7    |
|                                        |                          | **                 | ns               | *                | ns               | ns               | **               | ns                     | ***              | ***              | **               |
| Seed set                               | Spontaneous              | 0.0 $\pm$ 0.0      | 46.7 $\pm$ 38.8  | 42.0 $\pm$ 36.6  | 54.8 $\pm$ 83.2  | 62.0 $\pm$ 35.4  | 89.8 $\pm$ 109.9 | 58.0 $\pm$ 0.0         | 10.0 $\pm$ 0.0   | 0.0 $\pm$ 0.0    | 72 $\pm$ 100.4   |
|                                        | Self                     | 165.5 $\pm$ 47.1   | 137.7 $\pm$ 34.7 | 159.6 $\pm$ 58.7 | 139.7 $\pm$ 61.8 | 137.8 $\pm$ 66.1 | 159.8 $\pm$ 95.2 | 215.7 $\pm$ 59.0       | 165.6 $\pm$ 96.8 | 161.5 $\pm$ 35.8 | 190.5 $\pm$ 60.3 |
|                                        | Cross                    | 168.4 $\pm$ 67.5   | 120.2 $\pm$ 44.7 | 164.9 $\pm$ 65.4 | 164.6 $\pm$ 75.4 | 117.9 $\pm$ 62.8 | 227.1 $\pm$ 45.3 | 176.8 $\pm$ 94.8       | 175.2 $\pm$ 87.8 | 173.2 $\pm$ 49.7 | 161.7 $\pm$ 83.3 |
|                                        |                          | ns                 | ns               | ns               | ns               | ns               | **               | ns                     | ns               | ns               | ns               |
| Seed set mass (mg)                     | Spontaneous              | 0.0 $\pm$ 0.0      | 1.7 $\pm$ 5.7    | 3.7 $\pm$ 9.4    | 2.8 $\pm$ 10.5   | 1.7 $\pm$ 5.9    | 6.2 $\pm$ 18.6   | 19.6 $\pm$ 0.0         | 5.3 $\pm$ 0.0    | 0.0 $\pm$ 0.0    | 29.1 $\pm$ 38.6  |
|                                        | Self                     | 37.3 $\pm$ 10.5    | 41.6 $\pm$ 12.8  | 48.8 $\pm$ 17.4  | 42.3 $\pm$ 18.7  | 41.9 $\pm$ 20.4  | 53.8 $\pm$ 28.3  | 57.0 $\pm$ 16.1        | 55.9 $\pm$ 29.2  | 42.0 $\pm$ 14.6  | 49.5 $\pm$ 21.7  |
|                                        | Cross                    | 41.7 $\pm$ 17.9    | 32.5 $\pm$ 14.4  | 54.1 $\pm$ 19.7  | 50.2 $\pm$ 23.3  | 40.3 $\pm$ 18.5  | 78.9 $\pm$ 23.7  | 46.4 $\pm$ 24.2        | 63.9 $\pm$ 30.2  | 47.4 $\pm$ 16.1  | 43.5 $\pm$ 24.2  |
|                                        |                          | ns                 | ns               | ns               | ns               | ns               | ***              | ns                     | ns               | ns               | ns               |
| Individual seed weight (mg)            | Self                     | 0.23 $\pm$ 0.06    | 0.30 $\pm$ 0.06  | 0.32 $\pm$ 0.05  | 0.31 $\pm$ 0.05  | 0.40 $\pm$ 0.11  | 0.39 $\pm$ 0.14  | 0.28 $\pm$ 0.06        | 0.38 $\pm$ 0.08  | 0.25 $\pm$ 0.06  | 0.25 $\pm$ 0.07  |
|                                        | Cross                    | 0.25 $\pm$ 0.03    | 0.26 $\pm$ 0.06  | 0.33 $\pm$ 0.05  | 0.34 $\pm$ 0.10  | 0.36 $\pm$ 0.11  | 0.35 $\pm$ 0.06  | 0.28 $\pm$ 0.04        | 0.38 $\pm$ 0.07  | 0.27 $\pm$ 0.03  | 0.29 $\pm$ 0.23  |
|                                        |                          | ns                 | *                | ns               | ns               | ns               | ns               | ns                     | ns               | ns               | ns               |
